# Supplementary material
Source: PubMed Central journal article supplement (PMC10992159)
Supplement: 262_2022_3220_MOESM1_ESM.pdf [file 262_2022_3220_MOESM1_ESM.pdf]

Table S1. Immunogenic CT26 mutation percentage

| Gene     | Mutated sequence            | Substitution<br>(WT, AA#, Mut) | Reactive<br>T cell<br>subtype | Mutation<br>percentage |
|----------|-----------------------------|--------------------------------|-------------------------------|------------------------|
| Slc20a1  | DKPLRRNNSYTSYIMAICGMPLDSFRA | T425I                          | CD4                           | 50%▲                   |
| Nphp3    | AGTQCEYWASRALDSEHSIGSMIQLPQ | G234D                          | CD4                           | 50%▼                   |
| Slc4a3   | PLLPFYPPDEALEIGLELNSSALPTE  | T373I                          | CD4                           | 50%▲                   |
| Cxcr7    | MKAFIFKYSAKTGFTKLIDASRVSETE | L340F                          | CD4                           | 100%                   |
| E2f8     | VILPQAPSGPSYATYLQPAQAQMLTPP | I522T                          | CD8                           | 50%▼                   |
| Agxt2l2  | EHHRAGGLFVADAIQVGFRIGKHFV   | E247A                          | CD4                           | 50%▼                   |
| Nap1l4   | No mutation                 | -                              | CD4                           | -                      |
| Dhx35    | EVIQTSKYMRDVIAIESAWLLELAPH  | T646I                          | CD4                           | 50%                    |
| Als2     | No mutation                 | -                              | CD4                           | -                      |
| Deptor   | SHDSRKSTSFMSVNPSEIKIVSAVRR  | S253N                          | CD4                           | 100%                   |
| Tdg      | AAYKGHHYPGPGNYFWKCLFMSGLSEV | H169Y                          | CD4                           | 50%▲                   |
| Rpap2    | CGYPLCQKKLGVISKQKYRISTKTNKV | P113S                          | CD4                           | 50%▼                   |
| Steap2   | VTSIPSVSNALNWKEFSFIQSTLGYVA | R388K                          | CD4                           | 50%                    |
| Nbea     | PAPRAVLTGHDHEIVCVSVAELGLVI  | V576I                          | CD4                           | 100%                   |
| Aldh18a1 | LHSGQNHLKEMAISVLEARACAAAGQS | P154S                          | CD4                           | 50%▲                   |
| Zc3h14   | NCKYDTKCTKADCLFTHMSRRASILTP | P497L                          | CD4                           | 50%▼                   |
| Drosha   | LRSSLVNNRTQAKIAEELGMQEYAITN | V1189I                         | CD4                           | 100%                   |

The mutation percentage of genes was confirmed based on the study of mutant neoantigens that induce a therapeutic immune response to cancer in another group [31].

Bold text is mutated sequence site. Symbol ▲; more than, symbol ▼; below

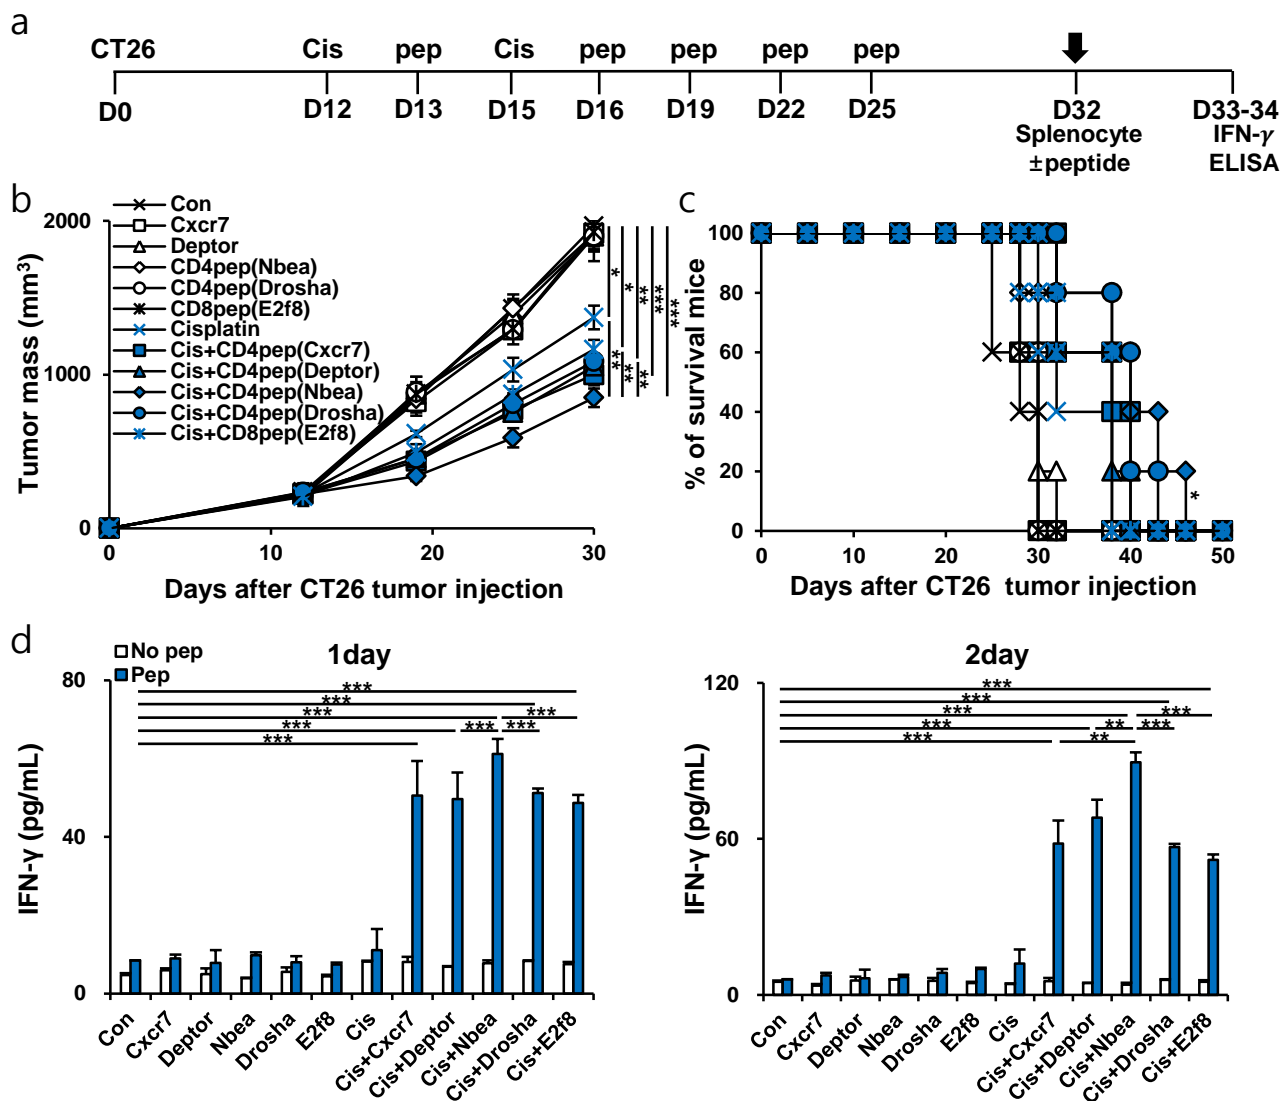

**Figure S1.** Tumor treatment effects of neoantigen vaccine in cisplatin-treated mouse model.

In the *in vivo* experiments, BALB/c mice were injected with  $2 \times 10^5$  CT26 cells (per mouse) subcutaneously and were treated intraperitoneally with 5 mg/kg cisplatin on days 12 and 15. Then, the mice were treated intratumorally with 20  $\mu$ g (per mouse) of CD4<sup>+</sup> or CD8<sup>+</sup> T cell neoantigen peptide on days 13, 16, 19, 22, and 25. (a) Schedule flowchart (b) Tumor mass was measured until the mice died or the diameter was over 2 cm ( $n = 5$ ). (c) Survival of the mice was observed for 50 days ( $n = 5$ ). (d) After a week of the last vaccination, splenocytes were isolated and re-stimulated with CD4<sup>+</sup> or CD8<sup>+</sup> T cell neoantigen peptide for 1 or 2 days, and the levels of IFN- $\gamma$  were estimated by ELISA. IBM SPSS Statistics Base 22.0 was used as the statistical tool to analyze the differences between the groups. \* $P < 0.05$ , \*\* $P < 0.01$ , \*\*\* $P < 0.001$ .

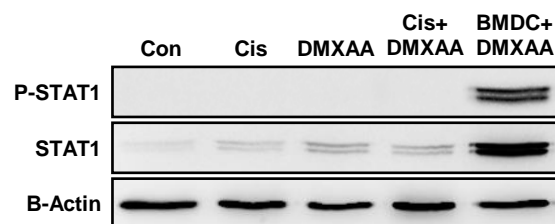

**Figure S2.** Phosphorylation and activation of STAT1 induced by STING and type 1 IFN signaling.

TC-1 tumor cells were treated with/without cisplatin (20  $\mu\text{g/ml}$ ) for 2-3h, wash out, and/or DMXAA (10  $\mu\text{g/ml}$ ) or DMXAA-treated C57BL/6 mouse BMDc supernatants were incubated overnight. Cells were harvested, lysed, and then evaluated for expression of STAT1 using Western blot analysis.

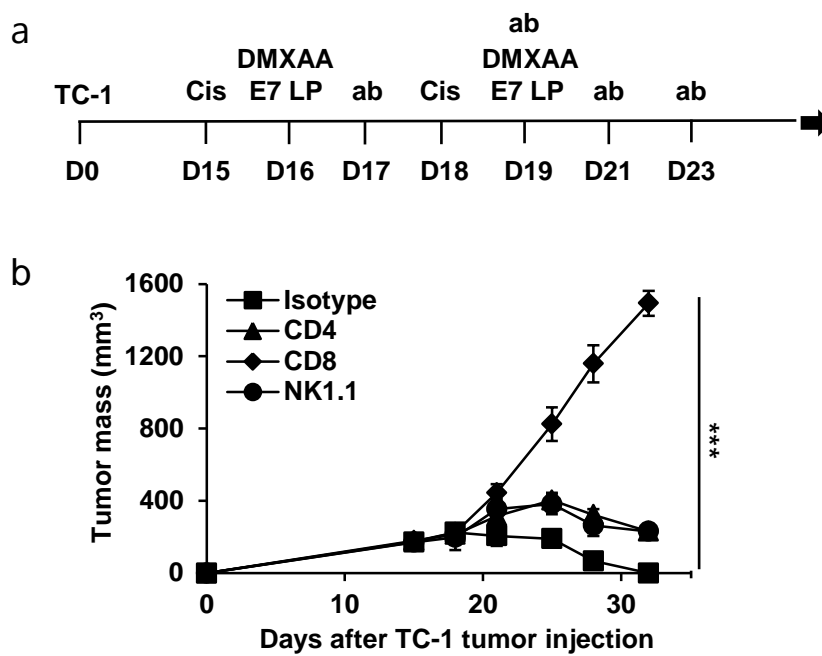

**Figure S3.** Direct tumor killing effect of CD8 T cells.

C57BL/6 mice were injected subcutaneously with  $2 \times 10^5$  TC-1 cells/mice on day 0. Mice were then treated and/or intraperitoneally with 5 mg/kg cisplatin on days 15 and 18, intratumorally with 20  $\mu$ g/mice of E7 long peptide with 100  $\mu$ g/mice of DMXAA on days 16 and 19, 100 $\mu$ g/mice of control isotype IgG or anti-CD4 or anti-CD8 or anti-NK depletion antibodies were injected intraperitoneally on days 17, 19, 21 and 23. (a) schedule flowchart (b) Tumor mass was measured until the mice died or the diameter was over 2 cm (n = 5). IBM SPSS Statistics Base 22.0 was used. \*P<0.05, \*\*P<0.01, \*\*\*P<0.001.

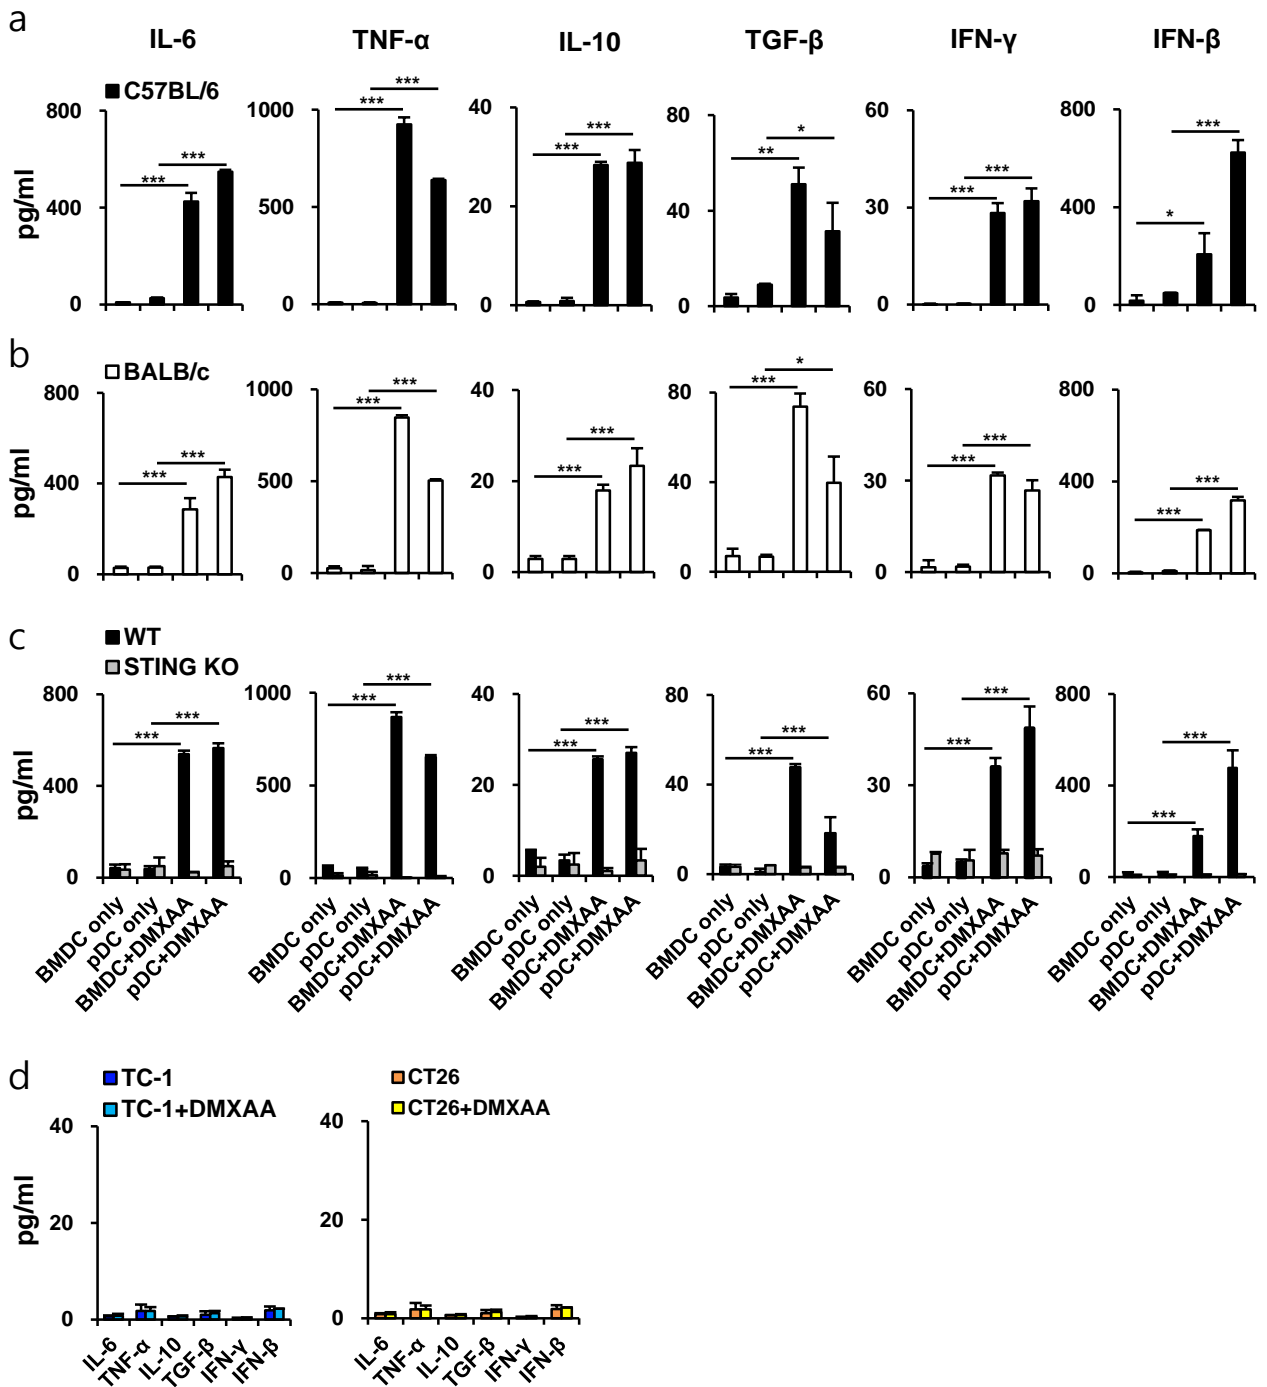

**Figure S4.** Various cytokines increase directly due to the presence and activation of STING and APC.

BMDC and pDC of C57BL/6, BALB/c and STING KO mice, TC-1 and CT26 tumor cells were treated with 5  $\mu$ g/ml of DMXAA. After incubation for 24 h, the supernatants were harvested and assessed for cytokine levels using a mouse IL-6, TNF- $\alpha$ , IL-10, TGF- $\beta$ , IFN- $\gamma$  and IFN- $\beta$  ELISA. (a) ELISA cytokine levels graph performed on BMDC and pDC of C57BL/6 mice (n = 3). (b) ELISA cytokine levels graph performed on BMDC and pDC of BALB/c mice (n = 3). (c) ELISA cytokine levels graph performed on BMDC and pDC of C57BL/6 (WT) and STING Knock out mice (n = 3). (d) ELISA cytokine levels graph performed on TC-1 and CT26 tumor cells (n = 3). IBM SPSS Statistics Base 22.0 was used. \*P<0.05, \*\*P<0.01, \*\*\*P<0.001.

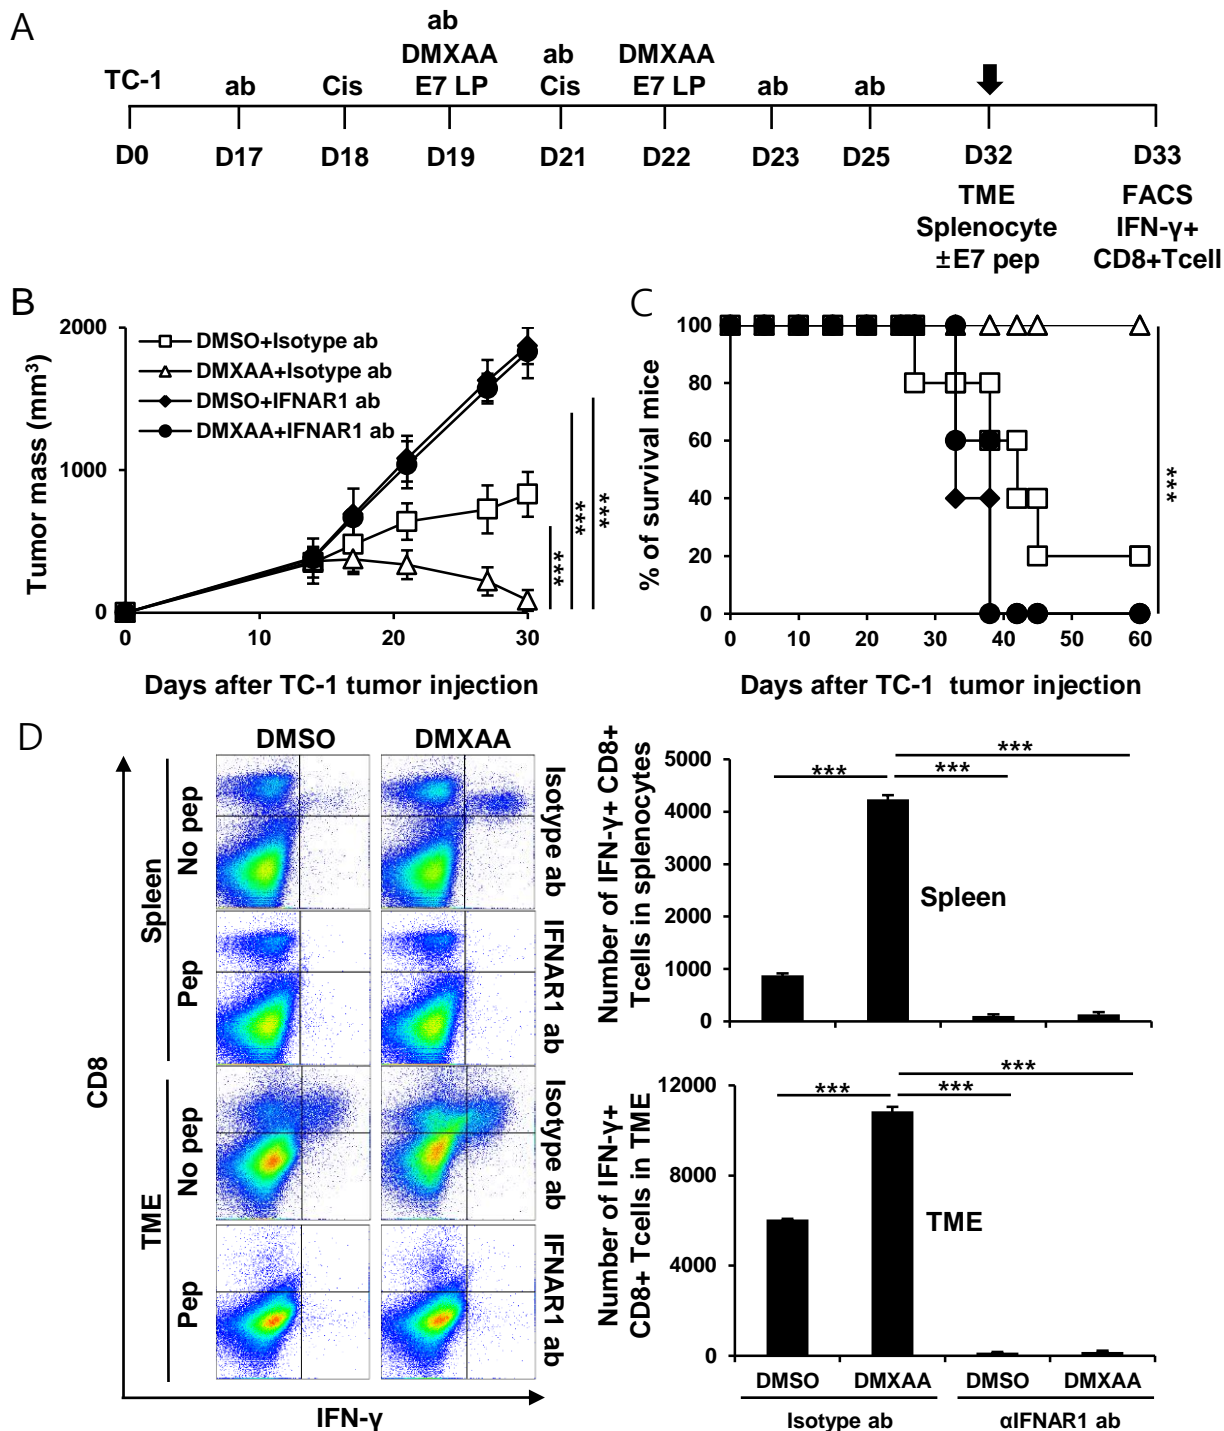

**Figure S5.** Blocking of type I IFN reduces the anticancer immune response. C57BL/6 mice were injected with  $2 \times 10^5$  TC-1 cells/mice subcutaneously on day 0. Mice were then treated intraperitoneally with 5 mg/kg cisplatin on days 18 and 21, intratumorally with 20  $\mu$ g/mice of E7 long peptide and/or with 100  $\mu$ g/mice of DMXAA on days 19 and 22. Also, treated intraperitoneally with 100  $\mu$ g/mice of isotype or IFNAR1 antibody on days 17, 19, 21, 23 and 25. (A) Schedule flowchart. (B) Tumor mass was measured until the mice died or the diameter was over 2 cm ( $n = 5$ ). (C) Survival of the mice was observed for 60 days ( $n = 5$ ). (D) After a week of the last vaccination, tumor tissues and spleens of TC-1 tumor-bearing mice were harvested and re-stimulated with E7 short peptide, and then analyzed of IFN- $\gamma$ + CD8+ T cells by flow cytometry ( $n = 3$ ). IBM SPSS Statistics Base 22.0 was used. \* $P < 0.05$ , \*\* $P < 0.01$ , \*\*\* $P < 0.001$ .
